# Supplementary material for: Gene Expression Profiles of Multiple Synchronous Lesions in Lung Adenocarcinoma
Source: MDPI journal article supplement (doi:10.3390/cells10123484), 2021-12-10
Supplement: s1 [file s1]

**Table S1.** Patient characteristics and specimen information

| Patient <sup>1</sup> | Age | Sex | Smoking<br>(pack-year) | Lesion | (P = 9, n = 38)              |
|----------------------|-----|-----|------------------------|--------|------------------------------|
| P1                   | 64  | M   | CS (20)                | NOR    | NOR                          |
|                      |     |     |                        | AAH    | AAH2, AAH3, AAH4             |
|                      |     |     |                        | ADC    | ADC2                         |
| P2                   | 75  | M   | ES (35)                | NOR    | NOR                          |
|                      |     |     |                        | AAH    | AAH                          |
|                      |     |     |                        | ADC    | ADC2                         |
| P3                   | 66  | M   | ES (10)                | NOR    | NOR                          |
|                      |     |     |                        | AAH    | AAH1, AAH2                   |
|                      |     |     |                        | ADC    | ADC                          |
| P4                   | 55  | F   | NS (0)                 | NOR    | NOR                          |
|                      |     |     |                        | AAH    | AAH                          |
|                      |     |     |                        | ADC    | ADC                          |
| P5                   | 53  | F   | NS (0)                 | NOR    | NOR                          |
|                      |     |     |                        | AAH    | AAH1, AAH2                   |
|                      |     |     |                        | ADC    | ADC                          |
| P8                   | 69  | M   | ES (30)                | NOR    | NOR                          |
|                      |     |     |                        | AAH    | AAH1, AAH2, AAH3, AAH4, AAH6 |
|                      |     |     |                        | ADC    | ADC                          |
| P9                   | 70  | F   | NS (0)                 | NOR    | NOR                          |
|                      |     |     |                        | AAH    | AAH                          |
|                      |     |     |                        | ADC    | ADC                          |
| P10                  | 72  | M   | CS (50)                | NOR    | NOR                          |
|                      |     |     |                        | AAH    | AAH                          |
|                      |     |     |                        | ADC    | ADC                          |
| P11                  | 51  | M   | ES (12)                | NOR    | NOR                          |
|                      |     |     |                        | AAH    | AAH1, AAH2                   |
|                      |     |     |                        | ADC    | ADC                          |

CS: current smoker, ES: ex-smoker, NS: never smoker; AAH: atypical adenomatous hyperplasia; ADC: adenocarcinoma; NOR: non-tumorous tissues

<sup>1</sup>Patient specimens were collected as part of a previous targeted sequencing and whole exome study and the same patient identification number was used.

**Table S2.** Primer sequences

| Gene           | RefSeq records                                                                 | Sequences                                                             |
|----------------|--------------------------------------------------------------------------------|-----------------------------------------------------------------------|
| <i>ACSL5</i>   | NM_016234.3, NM_203379.1,<br>NM_203380.1                                       | (F): 5'-CTCAACCCGTCTTACCTCTTC-3'<br>(R): 5'-CCTCATACATAGTCTTGGCATC-3' |
| <i>CCBE1</i>   | NM_133459.4                                                                    | (F): 5'-TACCGATATGACCGGGAGAG-3'<br>(R): 5'-AGCTGCCCAAGGTATTGATG-3'    |
| <i>SERINC2</i> | NM_001199039.1, NM_001199038.1,<br>NM_001199037.1, NM_018565.3,<br>NM_178865.4 | (F): 5'-ACCCTCTACACCATGTTTGTC-3'<br>(R): 5'-CACTGGGTCTCATAGCCCTC-3'   |
| <i>GAPDH</i>   | NM_002046.7, NM_001289745.3                                                    | (F): 5'-GAAGGTGAAGGTCGGAGTC-3'<br>(R): 5'-GAAGATGGTGATGGGATTTC-3'     |

**Table S3.** Histochemical scoring assessment (H-score)

| Patient | Label | Lesions         | ACSL5 | FUT2  | SERINC2 | DLX3  | CCBE1 |
|---------|-------|-----------------|-------|-------|---------|-------|-------|
| P1      | NOR*  | normal          | 130** |       | 100     |       |       |
|         | AAH2* | AAH             | 154** |       | 195     |       |       |
|         | AAH4* | AAH             | 210   |       | 200     |       |       |
|         | ADC1  | ADC-lepidic     | 245** |       | 202     |       |       |
|         | ADC2* | ADC-non lepidic | 265** |       | 205     |       |       |
| P2      | NOR*  | normal          |       | 5     |         | 5**   |       |
|         | AAH*  | AAH             |       | 50    |         | 20**  |       |
|         | AIS   | AIS             |       | 80    |         | 40    |       |
|         | ADC1  | ADC-lepidic     |       | 90    |         | 100** |       |
|         | AAH2* | ADC-non lepidic |       | 100   |         | 110** |       |
| P4      | NOR*  | normal          |       | 0     |         | 0     |       |
|         | AAH*  | AAH             |       | 190** |         | 210** |       |
|         | ADC*  | ADC-non lepidic |       | 170** |         | 175** |       |
| P5      | NOR*  | normal          |       | 0     |         |       | 0     |
|         | AAH1* | AAH             |       | 95**  |         |       | 0     |
|         | AAH2* | AAH             |       | 30**  |         |       | 0     |
|         | ADC*  | ADC             |       | 195** |         |       | 0     |
| P8      | NOR*  | normal          | 120   |       | 130**   |       |       |
|         | AAH3* | AAH             | 210   |       | 200**   |       |       |
|         | ADC*  | ADC             | 225   |       | 205**   |       |       |
| P9      | NOR*  | normal          | 70    |       | 15      |       |       |
|         | AAH*  | AAH             | 192   |       | 192     |       |       |
|         | ADC*  | ADC             | 220   |       | 192     |       |       |
| P10     | NOR*  | normal          | 30**  |       | 60      |       |       |
|         | ADC*  | ADC             | 280** |       | 130     |       |       |
| P11     | NOR*  | normal          | 170** |       | 10      |       |       |
|         | AAH1* | AAH             | 210** |       | 80**    |       |       |
|         | AAH2* | AAH             | 220** |       | 70**    |       |       |
|         | ADC*  | ADC             | 230** |       | 130**   |       |       |
| P18     | NOR   | normal          |       | 0**   |         |       | 0**   |
|         | AAH1  | AAH             |       | 10**  |         |       | 0     |
|         | ADC   | ADC             |       | 220** |         |       | 0**   |

\*Samples used in RNA-seq analysis

\*\*Samples used in IHC analysis

**Table S4.** Differential expression of genes which were overlapped with Sivakumar et al, 2017 study results (n=269)

| Gene             | Fold change (log2) |            |            | Cluster <sup>1</sup> |
|------------------|--------------------|------------|------------|----------------------|
|                  | AAH vs NOR         | ADC vs NOR | ADC vs AAH |                      |
| <i>SLIT2</i>     | -0.75              | -1.65      | -0.90      | 1                    |
| <i>DACH1</i>     | -0.86              | -2.43      | -1.57      | 1                    |
| <i>CCBE1</i>     | -0.92              | -2.14      | -1.22      | 1                    |
| <i>COL13A1</i>   | -0.97              | -1.81      | -0.84      | 1                    |
| <i>GRIA1</i>     | -1.03              | -1.97      | -0.94      | 1                    |
| <i>BCL6B</i>     | -1.05              | -2.73      | -1.69      | 1                    |
| <i>FIBIN</i>     | -1.09              | -2.39      | -1.30      | 1                    |
| <i>NPR3</i>      | -0.54              | -1.25      | -0.71      | 1                    |
| <i>RPL23AP32</i> | -0.47              | -1.24      | -0.76      | 1                    |
| <i>ITIH3</i>     | -0.44              | -1.21      | -0.78      | 1                    |
| <i>MFAP4</i>     | -0.63              | -1.52      | -0.89      | 1                    |
| <i>CRYAB</i>     | -0.48              | -1.42      | -0.94      | 1                    |
| <i>PKDCC</i>     | -0.74              | -1.69      | -0.96      | 1                    |
| <i>IL18R1</i>    | -0.41              | -1.38      | -0.96      | 1                    |
| <i>NKD1</i>      | -0.75              | -1.73      | -0.98      | 1                    |
| <i>LEPR</i>      | -0.47              | -1.44      | -0.98      | 1                    |
| <i>OLFML2A</i>   | -0.96              | -1.95      | -0.99      | 1                    |
| <i>VEGFC</i>     | -0.59              | -1.59      | -1.00      | 1                    |
| <i>LTBP4</i>     | -0.53              | -1.56      | -1.03      | 1                    |
| <i>THBD</i>      | -0.38              | -1.42      | -1.03      | 1                    |
| <i>GDF10</i>     | -0.59              | -1.65      | -1.06      | 1                    |
| <i>HEG1</i>      | -0.61              | -1.68      | -1.06      | 1                    |
| <i>ERG</i>       | -0.56              | -1.64      | -1.08      | 1                    |
| <i>SASH1</i>     | -0.42              | -1.52      | -1.09      | 1                    |
| <i>RAPGEF4</i>   | -0.52              | -1.63      | -1.11      | 1                    |
| <i>JAM2</i>      | -0.42              | -1.57      | -1.14      | 1                    |
| <i>PKNOX2</i>    | -0.68              | -1.83      | -1.15      | 1                    |
| <i>PALMD</i>     | -0.67              | -1.83      | -1.16      | 1                    |
| <i>ADAMTS8</i>   | -0.95              | -2.12      | -1.17      | 1                    |
| <i>HIGD1B</i>    | -0.67              | -1.88      | -1.21      | 1                    |
| <i>BMPER</i>     | -0.82              | -2.06      | -1.24      | 1                    |
| <i>FGFR4</i>     | -0.73              | -1.99      | -1.25      | 1                    |
| <i>ADRA1A</i>    | -0.79              | -2.06      | -1.26      | 1                    |
| <i>GRASP</i>     | -0.64              | -1.90      | -1.26      | 1                    |
| <i>IGSF10</i>    | -0.71              | -1.99      | -1.28      | 1                    |
| <i>KCTD16</i>    | -0.70              | -1.98      | -1.28      | 1                    |
| <i>COX4I2</i>    | -0.50              | -1.79      | -1.28      | 1                    |
| <i>STARD9</i>    | -0.55              | -1.83      | -1.28      | 1                    |
| <i>ARHGEF4</i>   | -0.66              | -1.95      | -1.29      | 1                    |
| <i>SIPRI</i>     | -0.63              | -1.91      | -1.29      | 1                    |
| <i>CDO1</i>      | -0.79              | -2.08      | -1.29      | 1                    |
| <i>COL5A3</i>    | -0.80              | -2.11      | -1.31      | 1                    |

|                   |       |       |       |   |
|-------------------|-------|-------|-------|---|
| <i>IL12A</i>      | -0.77 | -2.10 | -1.33 | 1 |
| <i>PDGFB</i>      | -0.57 | -1.93 | -1.37 | 1 |
| <i>GBP4</i>       | -0.71 | -2.08 | -1.37 | 1 |
| <i>CLEC1A</i>     | -0.72 | -2.10 | -1.38 | 1 |
| <i>LDB2</i>       | -0.59 | -1.99 | -1.40 | 1 |
| <i>AFAP1L1</i>    | -0.68 | -2.12 | -1.44 | 1 |
| <i>THSD1</i>      | -0.63 | -2.08 | -1.44 | 1 |
| <i>NKG7</i>       | -0.70 | -2.15 | -1.44 | 1 |
| <i>EGFL7</i>      | -0.65 | -2.10 | -1.45 | 1 |
| <i>GRK5</i>       | -0.58 | -2.03 | -1.45 | 1 |
| <i>FLT4</i>       | -0.64 | -2.11 | -1.46 | 1 |
| <i>CLEC14A</i>    | -0.79 | -2.26 | -1.47 | 1 |
| <i>TOX2</i>       | -0.63 | -2.12 | -1.49 | 1 |
| <i>CD93</i>       | -0.74 | -2.24 | -1.50 | 1 |
| <i>KIAA1462</i>   | -0.58 | -2.08 | -1.50 | 1 |
| <i>NCKAP5</i>     | -0.86 | -2.36 | -1.51 | 1 |
| <i>SEMA5A</i>     | -0.64 | -2.16 | -1.52 | 1 |
| <i>SCUBE1</i>     | -0.69 | -2.22 | -1.53 | 1 |
| <i>ADARB2</i>     | -0.96 | -2.51 | -1.55 | 1 |
| <i>SGCG</i>       | -0.92 | -2.50 | -1.59 | 1 |
| <i>NRN1</i>       | -0.58 | -2.17 | -1.59 | 1 |
| <i>GIMAP5</i>     | -0.75 | -2.34 | -1.60 | 1 |
| <i>RAMP2</i>      | -0.67 | -2.27 | -1.60 | 1 |
| <i>CSPG4</i>      | -0.60 | -2.25 | -1.64 | 1 |
| <i>KCNMB4</i>     | -0.64 | -2.32 | -1.68 | 1 |
| <i>ANO2</i>       | -0.77 | -2.45 | -1.68 | 1 |
| <i>NOVA2</i>      | -0.80 | -2.49 | -1.69 | 1 |
| <i>MYCT1</i>      | -0.72 | -2.42 | -1.70 | 1 |
| <i>CLEC3B</i>     | -0.75 | -2.45 | -1.70 | 1 |
| <i>RASIP1</i>     | -0.73 | -2.48 | -1.75 | 1 |
| <i>ARHGEF15</i>   | -0.67 | -2.48 | -1.81 | 1 |
| <i>GPIHBP1</i>    | -1.39 | -3.26 | -1.87 | 1 |
| <i>PKHD1L1</i>    | -0.76 | -2.66 | -1.91 | 1 |
| <i>KCNK3</i>      | -0.81 | -2.77 | -1.96 | 1 |
| <i>RXFP1</i>      | -0.75 | -2.74 | -1.99 | 1 |
| <i>SERTM1</i>     | -1.13 | -3.21 | -2.09 | 1 |
| <i>CLDN5</i>      | -1.13 | -3.62 | -2.49 | 1 |
| <i>TMIE</i>       | -0.85 | -1.23 | -0.37 | 1 |
| <i>ST6GALNAC5</i> | -0.40 | -1.26 | -0.85 | 1 |
| <i>GRAP</i>       | -0.40 | -1.40 | -1.01 | 1 |
| <i>LINC00312</i>  | -0.45 | -1.60 | -1.15 | 1 |
| <i>RGS6</i>       | -1.04 | -1.89 | -0.85 | 1 |
| <i>DPP6</i>       | -1.39 | -2.53 | -1.14 | 1 |
| <i>APLN</i>       | -0.76 | -2.70 | -1.93 | 1 |
| <i>ATOH8</i>      | -0.27 | -1.41 | -1.14 | 2 |
| <i>LAMP3</i>      | 0.48  | -0.80 | -1.29 | 2 |
| <i>GKN2</i>       | 0.34  | -1.05 | -1.39 | 2 |

|                   |       |       |       |   |
|-------------------|-------|-------|-------|---|
| <i>FHL5</i>       | -0.20 | -1.61 | -1.40 | 2 |
| <i>SFTPC</i>      | 0.53  | -0.93 | -1.45 | 2 |
| <i>SFTPA1</i>     | 0.61  | -0.86 | -1.46 | 2 |
| <i>ACADL</i>      | 0.04  | -1.56 | -1.60 | 2 |
| <i>SLC51B</i>     | 0.17  | -1.45 | -1.62 | 2 |
| <i>WISP2</i>      | -0.21 | -1.87 | -1.66 | 2 |
| <i>CLDN18</i>     | 0.19  | -1.62 | -1.81 | 2 |
| <i>SFTPA2</i>     | 0.61  | -1.36 | -1.98 | 2 |
| <i>MGAT3</i>      | -0.46 | -2.48 | -2.02 | 2 |
| <i>LGI3</i>       | 0.20  | -1.83 | -2.03 | 2 |
| <i>UPK3B</i>      | -0.54 | -2.58 | -2.04 | 2 |
| <i>CRTAC1</i>     | 0.78  | -1.41 | -2.19 | 2 |
| <i>PRKG2</i>      | 0.14  | -2.13 | -2.27 | 2 |
| <i>RS1</i>        | -0.36 | -3.10 | -2.74 | 2 |
| <i>SLC16A12</i>   | 0.78  | -2.15 | -2.93 | 2 |
| <i>LOC283299</i>  | -0.26 | -1.38 | -1.12 | 2 |
| <i>CA10</i>       | 3.77  | 6.56  | 2.79  | 3 |
| <i>GCNT3</i>      | 3.65  | 6.01  | 2.36  | 3 |
| <i>COL10A1</i>    | 3.26  | 5.73  | 2.47  | 3 |
| <i>ATP10B</i>     | 2.82  | 4.67  | 1.85  | 3 |
| <i>B3GNT3</i>     | 2.46  | 3.36  | 0.90  | 3 |
| <i>TMPRSS4</i>    | 2.42  | 4.57  | 2.15  | 3 |
| <i>FUT2</i>       | 2.40  | 4.14  | 1.74  | 3 |
| <i>TOX3</i>       | 2.17  | 3.54  | 1.36  | 3 |
| <i>METTL7B</i>    | 2.14  | 3.31  | 1.17  | 3 |
| <i>PKHD1</i>      | 2.10  | 3.06  | 0.96  | 3 |
| <i>EPHA10</i>     | 1.99  | 4.26  | 2.27  | 3 |
| <i>Clorf53</i>    | 1.75  | 2.47  | 0.73  | 3 |
| <i>ABCC3</i>      | 1.74  | 3.04  | 1.30  | 3 |
| <i>KCNQ3</i>      | 1.57  | 2.34  | 0.76  | 3 |
| <i>ST6GALNAC1</i> | 1.51  | 2.69  | 1.18  | 3 |
| <i>LAD1</i>       | 1.47  | 2.02  | 0.56  | 3 |
| <i>ETV4</i>       | 1.41  | 3.48  | 2.07  | 3 |
| <i>KIF26B</i>     | 1.38  | 2.75  | 1.37  | 3 |
| <i>SPDEF</i>      | 1.33  | 3.17  | 1.84  | 3 |
| <i>SERINC2</i>    | 1.26  | 2.32  | 1.06  | 3 |
| <i>TMEM184A</i>   | 1.19  | 1.85  | 0.66  | 3 |
| <i>NT5E</i>       | 1.09  | 2.48  | 1.39  | 3 |
| <i>SPTBN2</i>     | 1.00  | 2.53  | 1.53  | 3 |
| <i>KCNK1</i>      | 0.97  | 1.42  | 0.45  | 3 |
| <i>TMEM45B</i>    | 0.89  | 1.54  | 0.65  | 3 |
| <i>TMED3</i>      | 0.89  | 1.31  | 0.42  | 3 |
| <i>AP1M2</i>      | 0.87  | 1.29  | 0.42  | 3 |
| <i>TXNDC17</i>    | 0.83  | 1.45  | 0.62  | 3 |
| <i>PYCR1</i>      | 0.80  | 2.42  | 1.62  | 3 |
| <i>GOLM1</i>      | 0.80  | 1.91  | 1.11  | 3 |
| <i>RAB25</i>      | 0.78  | 1.61  | 0.83  | 3 |

|                 |      |      |      |   |
|-----------------|------|------|------|---|
| <i>EPCAM</i>    | 0.73 | 1.91 | 1.17 | 3 |
| <i>PRSS16</i>   | 0.71 | 1.56 | 0.85 | 3 |
| <i>EHF</i>      | 0.71 | 1.55 | 0.85 | 3 |
| <i>OCIAD2</i>   | 0.69 | 1.58 | 0.89 | 3 |
| <i>ZDHHC13</i>  | 0.65 | 1.26 | 0.60 | 3 |
| <i>ENC1</i>     | 0.62 | 1.56 | 0.94 | 3 |
| <i>ACSL5</i>    | 0.62 | 1.90 | 1.28 | 3 |
| <i>COL17A1</i>  | 1.36 | 4.11 | 2.75 | 3 |
| <i>ABCA12</i>   | 2.51 | 4.75 | 2.23 | 3 |
| <i>RASAL1</i>   | 0.78 | 2.82 | 2.04 | 3 |
| <i>CEACAM6</i>  | 0.81 | 2.66 | 1.84 | 3 |
| <i>CLIC6</i>    | 1.27 | 3.04 | 1.76 | 3 |
| <i>PLD5</i>     | 1.40 | 3.03 | 1.63 | 3 |
| <i>ARHGEF19</i> | 0.57 | 2.07 | 1.50 | 3 |
| <i>KIF20A</i>   | 0.72 | 2.20 | 1.48 | 3 |
| <i>PSAT1</i>    | 0.78 | 2.25 | 1.47 | 3 |
| <i>PLEKHN1</i>  | 0.73 | 2.18 | 1.45 | 3 |
| <i>LRAT</i>     | 1.44 | 2.89 | 1.45 | 3 |
| <i>LRIG3</i>    | 0.54 | 1.88 | 1.35 | 3 |
| <i>MACC1</i>    | 0.62 | 1.84 | 1.22 | 3 |
| <i>LAPTM4B</i>  | 0.77 | 1.95 | 1.19 | 3 |
| <i>C1orf106</i> | 0.50 | 1.68 | 1.18 | 3 |
| <i>TK1</i>      | 0.84 | 2.00 | 1.16 | 3 |
| <i>SNORA10</i>  | 0.59 | 1.72 | 1.14 | 3 |
| <i>KCNK5</i>    | 0.72 | 1.85 | 1.13 | 3 |
| <i>RHPN1</i>    | 0.43 | 1.48 | 1.05 | 3 |
| <i>FERMT1</i>   | 0.61 | 1.64 | 1.03 | 3 |
| <i>F2RL1</i>    | 0.70 | 1.69 | 1.00 | 3 |
| <i>UGT8</i>     | 0.96 | 1.94 | 0.98 | 3 |
| <i>MAL2</i>     | 0.77 | 1.73 | 0.96 | 3 |
| <i>ARHGEF16</i> | 0.50 | 1.44 | 0.94 | 3 |
| <i>TFAP2C</i>   | 0.63 | 1.52 | 0.89 | 3 |
| <i>GRHL2</i>    | 0.45 | 1.25 | 0.80 | 3 |
| <i>SLC25A10</i> | 0.78 | 1.55 | 0.77 | 3 |
| <i>SRD5A3</i>   | 0.49 | 1.23 | 0.74 | 3 |
| <i>ATP1B1</i>   | 0.67 | 1.34 | 0.67 | 3 |
| <i>ENO1</i>     | 0.60 | 1.24 | 0.64 | 3 |
| <i>TLCD1</i>    | 0.63 | 1.23 | 0.60 | 3 |
| <i>CXCL13</i>   | 2.96 | 4.67 | 1.71 | 3 |
| <i>BAAT</i>     | 2.22 | 3.27 | 1.05 | 3 |
| <i>CST2</i>     | 1.37 | 2.96 | 1.59 | 3 |
| <i>ANKRD22</i>  | 1.27 | 2.72 | 1.45 | 3 |
| <i>EPN3</i>     | 1.41 | 2.60 | 1.19 | 3 |
| <i>BCL2L15</i>  | 0.97 | 1.94 | 0.97 | 3 |
| <i>COCH</i>     | 1.06 | 1.79 | 0.73 | 3 |
| <i>GOLGA7B</i>  | 0.79 | 1.78 | 0.99 | 3 |
| <i>AGR2</i>     | 1.02 | 1.76 | 0.74 | 3 |

|                  |       |      |      |   |
|------------------|-------|------|------|---|
| <i>PAFAH1B3</i>  | 0.65  | 1.67 | 1.03 | 3 |
| <i>ADORA2B</i>   | 0.68  | 1.47 | 0.78 | 3 |
| <i>KDELR3</i>    | 0.76  | 1.45 | 0.70 | 3 |
| <i>SNORA74A</i>  | 0.61  | 1.40 | 0.79 | 3 |
| <i>SNORA71A</i>  | 0.84  | 1.31 | 0.48 | 3 |
| <i>REEP6</i>     | 0.43  | 1.28 | 0.85 | 3 |
| <i>VWA2</i>      | 0.62  | 1.27 | 0.65 | 3 |
| <i>CD180</i>     | 0.80  | 1.25 | 0.45 | 3 |
| <i>UNC5CL</i>    | 0.73  | 1.24 | 0.51 | 3 |
| <i>ZDHHC9</i>    | 0.65  | 1.21 | 0.55 | 3 |
| <i>NRIP3</i>     | 0.53  | 5.62 | 5.09 | 4 |
| <i>NPTX1</i>     | -0.35 | 4.61 | 4.96 | 4 |
| <i>COL22A1</i>   | 0.09  | 3.69 | 3.60 | 4 |
| <i>CRABP2</i>    | -0.22 | 2.86 | 3.08 | 4 |
| <i>MEX3A</i>     | -1.26 | 1.73 | 3.00 | 4 |
| <i>SRCIN1</i>    | -0.40 | 1.83 | 2.23 | 4 |
| <i>KIF4A</i>     | -0.20 | 2.02 | 2.22 | 4 |
| <i>SCUBE3</i>    | 0.72  | 2.87 | 2.15 | 4 |
| <i>NUP210L</i>   | 0.63  | 2.78 | 2.15 | 4 |
| <i>CDC20</i>     | -0.08 | 2.01 | 2.08 | 4 |
| <i>HIST1H2AJ</i> | -0.39 | 1.67 | 2.06 | 4 |
| <i>TUBB3</i>     | -0.58 | 1.49 | 2.06 | 4 |
| <i>TTK</i>       | 0.21  | 2.27 | 2.06 | 4 |
| <i>KRT80</i>     | 0.02  | 2.06 | 2.04 | 4 |
| <i>SIX4</i>      | 0.15  | 2.19 | 2.04 | 4 |
| <i>EEF1A2</i>    | 0.55  | 2.54 | 1.99 | 4 |
| <i>CLDN1</i>     | 0.30  | 2.28 | 1.98 | 4 |
| <i>SNORA69</i>   | 0.07  | 2.03 | 1.96 | 4 |
| <i>MKI67</i>     | 0.01  | 1.90 | 1.89 | 4 |
| <i>ASPM</i>      | -0.20 | 1.68 | 1.88 | 4 |
| <i>GREB1</i>     | -0.06 | 1.80 | 1.85 | 4 |
| <i>FAM111B</i>   | -0.44 | 1.38 | 1.82 | 4 |
| <i>COL1A1</i>    | -0.04 | 1.78 | 1.82 | 4 |
| <i>CHRNA5</i>    | -0.33 | 1.45 | 1.78 | 4 |
| <i>HOXD4</i>     | 0.44  | 2.13 | 1.69 | 4 |
| <i>COL3A1</i>    | 0.04  | 1.70 | 1.65 | 4 |
| <i>LGR4</i>      | 0.29  | 1.94 | 1.65 | 4 |
| <i>DLGAP5</i>    | 0.32  | 1.96 | 1.63 | 4 |
| <i>RRM2</i>      | 0.03  | 1.57 | 1.54 | 4 |
| <i>TFAP2A</i>    | -0.23 | 1.30 | 1.53 | 4 |
| <i>DIO2</i>      | -0.01 | 1.48 | 1.49 | 4 |
| <i>BUB1B</i>     | 0.03  | 1.51 | 1.48 | 4 |
| <i>HIST1H3B</i>  | 0.00  | 1.47 | 1.47 | 4 |
| <i>CCNB2</i>     | -0.50 | 0.95 | 1.46 | 4 |
| <i>NQO1</i>      | 0.26  | 1.71 | 1.46 | 4 |
| <i>LGI2</i>      | -0.07 | 1.38 | 1.45 | 4 |
| <i>MDK</i>       | 0.06  | 1.49 | 1.42 | 4 |

|                 |       |       |       |   |
|-----------------|-------|-------|-------|---|
| <i>THBS2</i>    | -0.01 | 1.38  | 1.39  | 4 |
| <i>MCM10</i>    | -0.43 | 0.95  | 1.38  | 4 |
| <i>FHL2</i>     | -0.40 | 0.92  | 1.32  | 4 |
| <i>STIL</i>     | 0.11  | 1.42  | 1.31  | 4 |
| <i>MFAP2</i>    | 0.10  | 1.35  | 1.24  | 4 |
| <i>FAP</i>      | 0.31  | 1.20  | 0.89  | 4 |
| <i>LHFPL4</i>   | 1.05  | 4.09  | 3.03  | 4 |
| <i>HIST1H4L</i> | 0.55  | 2.12  | 1.57  | 4 |
| <i>DNAJC12</i>  | 0.37  | 1.84  | 1.47  | 4 |
| <i>IL6</i>      | -2.86 | -3.67 | -0.81 | 5 |
| <i>CCDC81</i>   | -0.98 | -1.23 | -0.25 | 5 |
| <i>CCDC17</i>   | -1.12 | -1.52 | -0.40 | 5 |
| <i>DLEC1</i>    | -1.36 | -1.61 | -0.25 | 5 |
| <i>DCDC1</i>    | -1.47 | -1.95 | -0.48 | 5 |
| <i>HABP2</i>    | 6.01  | 6.54  | 0.53  | 7 |
| <i>CEACAM8</i>  | 4.19  | 3.61  | -0.58 | 7 |
| <i>GDF15</i>    | 3.31  | 3.61  | 0.30  | 7 |
| <i>CRYM</i>     | 3.12  | 4.07  | 0.95  | 7 |
| <i>CRLF1</i>    | 2.84  | 2.94  | 0.10  | 7 |
| <i>MMP7</i>     | 2.76  | 2.89  | 0.13  | 7 |
| <i>SCTR</i>     | 1.98  | 2.32  | 0.34  | 7 |
| <i>GLS2</i>     | 1.94  | 2.20  | 0.26  | 7 |
| <i>ACSM3</i>    | 1.58  | 1.98  | 0.40  | 7 |
| <i>WNT4</i>     | 1.57  | 2.10  | 0.53  | 7 |
| <i>RAP1GAP</i>  | 1.52  | 1.54  | 0.02  | 7 |
| <i>CLEC5A</i>   | 1.39  | 1.80  | 0.41  | 7 |
| <i>GGT5</i>     | 1.39  | 1.55  | 0.16  | 7 |
| <i>CXCL17</i>   | 1.37  | 1.54  | 0.17  | 7 |
| <i>HPN</i>      | 1.37  | 1.14  | -0.22 | 7 |
| <i>MUC1</i>     | 1.35  | 1.74  | 0.39  | 7 |
| <i>LMO3</i>     | 1.30  | 1.41  | 0.11  | 7 |
| <i>TMEM92</i>   | 1.28  | 1.70  | 0.42  | 7 |
| <i>CDH3</i>     | 1.24  | 1.37  | 0.13  | 7 |
| <i>GOLT1A</i>   | 1.20  | 1.36  | 0.17  | 7 |
| <i>MGST1</i>    | 1.10  | 1.22  | 0.12  | 7 |
| <i>FOXA3</i>    | 2.36  | 3.10  | 0.73  | 7 |
| <i>CTSE</i>     | 1.37  | 1.72  | 0.36  | 7 |
| <i>PLA2G10</i>  | 1.11  | 1.28  | 0.17  | 7 |
| <i>AGBL1</i>    | 1.00  | -0.88 | -1.88 | 8 |

<sup>1</sup>Cluster number denotes the eight distinct expression pattern across normal to AAH, and to ADC; cluster 1,  $\searrow \searrow$ ; Cluster 2,  $\rightarrow \searrow$ ; Cluster 3,  $\nearrow \nearrow$ ; Cluster 4,  $\rightarrow \nearrow$ ; Cluster 5,  $\searrow \rightarrow$ ; Cluster 6,  $\searrow \nearrow$ ; Cluster 7,  $\nearrow \rightarrow$ ; Cluster8,  $\nearrow \searrow$

AAH, atypical adenomatous hyperplasia; ADC, adenocarcinoma; NOR, normal lung sample;

**Table S5.** Differentially expressed genes which were overlapped with the PanCancer Immune Profiling Panel gene lists (n=145)

| Gene            | Fold change (log2) |            |            | Cluster <sup>1</sup> |
|-----------------|--------------------|------------|------------|----------------------|
|                 | AAH vs NOR         | ADC vs NOR | ADC vs AAH |                      |
| <i>IL1B</i>     | -1.15              | -1.85      | -0.70      | 1                    |
| <i>ABCB1</i>    | -1.17              | -1.84      | -0.67      | 1                    |
| <i>TNFAIP3</i>  | -1.26              | -2.04      | -0.77      | 1                    |
| <i>IRF1</i>     | -1.47              | -2.12      | -0.65      | 1                    |
| <i>NFKBIA</i>   | -0.65              | -1.43      | -0.78      | 1                    |
| <i>ETS1</i>     | -0.35              | -1.25      | -0.90      | 1                    |
| <i>NLRP3</i>    | -0.61              | -1.53      | -0.92      | 1                    |
| <i>IL18R1</i>   | -0.41              | -1.38      | -0.96      | 1                    |
| <i>FEZ1</i>     | -0.42              | -1.39      | -0.97      | 1                    |
| <i>MAPK11</i>   | -0.61              | -1.59      | -0.98      | 1                    |
| <i>VEGFC</i>    | -0.59              | -1.59      | -1.00      | 1                    |
| <i>THBD</i>     | -0.38              | -1.42      | -1.03      | 1                    |
| <i>MCAM</i>     | -0.43              | -1.50      | -1.06      | 1                    |
| <i>LILRB2</i>   | -0.68              | -1.75      | -1.07      | 1                    |
| <i>LILRA5</i>   | -0.60              | -1.70      | -1.10      | 1                    |
| <i>ITGA5</i>    | -0.50              | -1.61      | -1.11      | 1                    |
| <i>LILRA1</i>   | -0.63              | -1.76      | -1.13      | 1                    |
| <i>IL1R2</i>    | -0.85              | -2.00      | -1.16      | 1                    |
| <i>ITGA2B</i>   | -0.45              | -1.67      | -1.22      | 1                    |
| <i>LRRN3</i>    | -0.47              | -1.73      | -1.26      | 1                    |
| <i>IL12A</i>    | -0.77              | -2.10      | -1.33      | 1                    |
| <i>CX3CL1</i>   | -0.79              | -2.15      | -1.36      | 1                    |
| <i>MEFV</i>     | -0.77              | -2.19      | -1.42      | 1                    |
| <i>MME</i>      | -0.66              | -2.26      | -1.60      | 1                    |
| <i>CXCR2</i>    | -0.52              | -1.24      | -0.72      | 1                    |
| <i>PDCD1LG2</i> | -0.43              | -1.24      | -0.81      | 1                    |
| <i>KLRK1</i>    | -0.37              | -1.24      | -0.87      | 1                    |
| <i>HSD11B1</i>  | -0.71              | -1.25      | -0.54      | 1                    |
| <i>CREB5</i>    | -0.78              | -1.36      | -0.58      | 1                    |
| <i>CD34</i>     | -0.75              | -1.37      | -0.63      | 1                    |
| <i>IL5RA</i>    | -0.68              | -1.46      | -0.78      | 1                    |
| <i>IL1RL1</i>   | -0.76              | -1.54      | -0.78      | 1                    |
| <i>FPR2</i>     | -0.93              | -1.57      | -0.64      | 1                    |
| <i>TNFRSF4</i>  | -1.03              | -1.61      | -0.58      | 1                    |
| <i>CDKN1A</i>   | -0.87              | -1.64      | -0.76      | 1                    |
| <i>IL1A</i>     | -0.81              | -1.70      | -0.89      | 1                    |
| <i>S100A8</i>   | -0.80              | -1.77      | -0.97      | 1                    |
| <i>KIR3DL2</i>  | -0.60              | -1.78      | -1.18      | 1                    |
| <i>XCL2</i>     | -0.85              | -1.88      | -1.03      | 1                    |
| <i>CCL16</i>    | -0.58              | -1.94      | -1.35      | 1                    |
| <i>CCL14</i>    | -0.82              | -2.16      | -1.34      | 1                    |
| <i>IL3RA</i>    | -0.98              | -2.17      | -1.18      | 1                    |

|                |       |       |       |   |
|----------------|-------|-------|-------|---|
| <i>CLEC6A</i>  | -0.68 | -2.24 | -1.57 | 1 |
| <i>CXCR1</i>   | -1.09 | -2.26 | -1.17 | 1 |
| <i>ARG1</i>    | -1.91 | -3.06 | -1.15 | 1 |
| <i>CSF3</i>    | -1.88 | -3.07 | -1.19 | 1 |
| <i>CCL26</i>   | -1.31 | -3.08 | -1.78 | 1 |
| <i>NFATC1</i>  | -0.33 | -1.30 | -0.97 | 2 |
| <i>ICAM2</i>   | -0.35 | -1.36 | -1.02 | 2 |
| <i>PRF1</i>    | -0.37 | -1.41 | -1.05 | 2 |
| <i>KLRD1</i>   | -0.35 | -1.47 | -1.11 | 2 |
| <i>CX3CR1</i>  | -0.30 | -1.42 | -1.12 | 2 |
| <i>MARCO</i>   | -0.18 | -1.39 | -1.21 | 2 |
| <i>CFP</i>     | -0.28 | -1.50 | -1.22 | 2 |
| <i>CFD</i>     | -0.16 | -1.39 | -1.23 | 2 |
| <i>TREM1</i>   | 0.10  | -1.16 | -1.25 | 2 |
| <i>LAMP3</i>   | 0.48  | -0.80 | -1.29 | 2 |
| <i>SLC11A1</i> | 0.14  | -1.21 | -1.34 | 2 |
| <i>IL18RAP</i> | -0.39 | -1.78 | -1.38 | 2 |
| <i>PECAM1</i>  | -0.43 | -1.82 | -1.39 | 2 |
| <i>CXCL2</i>   | -0.06 | -1.45 | -1.39 | 2 |
| <i>MASP1</i>   | -0.31 | -1.81 | -1.50 | 2 |
| <i>GZMH</i>    | -0.54 | -2.05 | -1.51 | 2 |
| <i>KLRF1</i>   | -0.38 | -1.89 | -1.52 | 2 |
| <i>GZMB</i>    | -0.55 | -2.09 | -1.54 | 2 |
| <i>TAL1</i>    | -0.01 | -1.60 | -1.58 | 2 |
| <i>TBX21</i>   | -0.38 | -1.98 | -1.60 | 2 |
| <i>CTSW</i>    | -0.13 | -1.82 | -1.69 | 2 |
| <i>CSF3R</i>   | 0.72  | -1.06 | -1.78 | 2 |
| <i>CAMP</i>    | -0.32 | -2.22 | -1.90 | 2 |
| <i>CDH5</i>    | -0.47 | -2.37 | -1.90 | 2 |
| <i>KIR2DL3</i> | -0.59 | -2.68 | -2.09 | 2 |
| <i>GNLY</i>    | -0.54 | -2.63 | -2.10 | 2 |
| <i>CD160</i>   | -0.46 | -2.61 | -2.15 | 2 |
| <i>CD36</i>    | -0.48 | -2.65 | -2.17 | 2 |
| <i>NCR1</i>    | -0.37 | -2.59 | -2.22 | 2 |
| <i>KIR2DL1</i> | -0.27 | -3.22 | -2.95 | 2 |
| <i>KIR3DL1</i> | -0.62 | -3.89 | -3.27 | 2 |
| <i>SH2D1B</i>  | -0.20 | -3.75 | -3.55 | 2 |
| <i>EGR1</i>    | -0.30 | -1.40 | -1.10 | 2 |
| <i>CCL3L1</i>  | -0.04 | -2.55 | -2.51 | 2 |
| <i>CD24</i>    | 2.39  | 3.45  | 1.06  | 3 |
| <i>DPP4</i>    | 1.87  | 2.75  | 0.88  | 3 |
| <i>NT5E</i>    | 1.09  | 2.48  | 1.39  | 3 |
| <i>EPCAM</i>   | 0.73  | 1.91  | 1.17  | 3 |
| <i>MNX1</i>    | 2.91  | 5.61  | 2.70  | 3 |
| <i>CD1A</i>    | 1.56  | 3.65  | 2.09  | 3 |
| <i>CEACAM6</i> | 0.81  | 2.66  | 1.84  | 3 |
| <i>CEACAM1</i> | 0.81  | 2.20  | 1.39  | 3 |

|                |       |       |       |   |
|----------------|-------|-------|-------|---|
| <i>S100B</i>   | 1.21  | 2.53  | 1.32  | 3 |
| <i>TNFSF15</i> | 1.00  | 2.23  | 1.24  | 3 |
| <i>F2RL1</i>   | 0.70  | 1.69  | 1.00  | 3 |
| <i>IL22RA2</i> | 2.27  | 4.73  | 2.46  | 3 |
| <i>CXCL13</i>  | 2.96  | 4.67  | 1.71  | 3 |
| <i>CR2</i>     | 1.56  | 3.39  | 1.83  | 3 |
| <i>CD19</i>    | 0.98  | 2.72  | 1.73  | 3 |
| <i>PAX5</i>    | 0.89  | 2.45  | 1.56  | 3 |
| <i>PMCH</i>    | 1.03  | 2.34  | 1.31  | 3 |
| <i>CCL17</i>   | 1.41  | 2.18  | 0.77  | 3 |
| <i>C5</i>      | 1.30  | 2.04  | 0.74  | 3 |
| <i>FOXP3</i>   | 1.13  | 1.98  | 0.85  | 3 |
| <i>CCL22</i>   | 1.32  | 1.91  | 0.59  | 3 |
| <i>MS4A1</i>   | 0.68  | 1.91  | 1.22  | 3 |
| <i>SPINK5</i>  | 1.02  | 1.91  | 0.89  | 3 |
| <i>BLK</i>     | 0.72  | 1.72  | 1.00  | 3 |
| <i>DMBT1</i>   | 0.53  | 1.40  | 0.87  | 3 |
| <i>CCR6</i>    | 0.71  | 1.38  | 0.67  | 3 |
| <i>HLA-DOB</i> | 0.54  | 1.38  | 0.84  | 3 |
| <i>IL2RA</i>   | 0.57  | 1.26  | 0.69  | 3 |
| <i>CD180</i>   | 0.80  | 1.25  | 0.45  | 3 |
| <i>CSF2</i>    | 0.57  | 1.21  | 0.65  | 3 |
| <i>CXCL14</i>  | 0.86  | 4.44  | 3.58  | 4 |
| <i>SPP1</i>    | 0.94  | 4.40  | 3.46  | 4 |
| <i>C8A</i>     | 0.10  | 2.47  | 2.37  | 4 |
| <i>TTK</i>     | 0.21  | 2.27  | 2.06  | 4 |
| <i>COL3A1</i>  | 0.04  | 1.70  | 1.65  | 4 |
| <i>IL1RL2</i>  | -0.29 | 1.30  | 1.58  | 4 |
| <i>CCL28</i>   | 0.09  | 1.47  | 1.38  | 4 |
| <i>CDH1</i>    | 0.43  | 1.65  | 1.21  | 4 |
| <i>CDK1</i>    | 0.28  | 1.25  | 0.97  | 4 |
| <i>LTB</i>     | 0.22  | 1.22  | 1.00  | 4 |
| <i>CCL2</i>    | -1.36 | -1.46 | -0.10 | 5 |
| <i>CCL21</i>   | -1.44 | -1.68 | -0.24 | 5 |
| <i>CXCL10</i>  | -1.57 | -1.44 | 0.13  | 5 |
| <i>CXCL9</i>   | -2.25 | -1.57 | 0.68  | 5 |
| <i>IFNG</i>    | -2.36 | -2.82 | -0.46 | 5 |
| <i>IL6</i>     | -2.86 | -3.67 | -0.81 | 5 |
| <i>C9</i>      | -3.01 | -1.53 | 1.48  | 5 |
| <i>TNF</i>     | -1.04 | -1.27 | -0.23 | 5 |
| <i>SELE</i>    | -1.59 | -1.98 | -0.39 | 5 |
| <i>CXCL8</i>   | -1.72 | -2.18 | -0.46 | 5 |
| <i>CXCL11</i>  | -1.85 | -2.22 | -0.37 | 5 |
| <i>ADORA2A</i> | -2.35 | -2.78 | -0.43 | 5 |
| <i>FUT5</i>    | -2.83 | -3.38 | -0.55 | 5 |
| <i>CCL7</i>    | -4.08 | -0.20 | 3.88  | 6 |
| <i>CEACAM8</i> | 4.19  | 3.61  | -0.58 | 7 |

|                 |      |       |       |   |
|-----------------|------|-------|-------|---|
| <i>C4BPA</i>    | 2.34 | 2.00  | -0.33 | 7 |
| <i>IL13RA2</i>  | 2.08 | 2.41  | 0.33  | 7 |
| <i>CLEC5A</i>   | 1.39 | 1.80  | 0.41  | 7 |
| <i>MUC1</i>     | 1.35 | 1.74  | 0.39  | 7 |
| <i>CTSH</i>     | 1.23 | 0.89  | -0.34 | 7 |
| <i>TLR10</i>    | 1.33 | 1.80  | 0.47  | 7 |
| <i>CD79A</i>    | 1.33 | 1.78  | 0.45  | 7 |
| <i>TNFRSF17</i> | 1.79 | 1.61  | -0.18 | 7 |
| <i>LTK</i>      | 0.89 | -0.68 | -1.57 | 8 |

---

<sup>1</sup>Cluster number denotes the eight distinct expression pattern across normal to AAH, and to ADC; cluster 1,  $\searrow \searrow$ ; Cluster 2,  $\rightarrow \searrow$ ; Cluster 3,  $\nearrow \nearrow$ ; Cluster 4,  $\rightarrow \nearrow$ ; Cluster 5,  $\searrow \rightarrow$ ; Cluster 6,  $\searrow \nearrow$ ; Cluster 7,  $\nearrow \rightarrow$ ; Cluster8,  $\nearrow \searrow$

AAH, atypical adenomatous hyperplasia; ADC, adenocarcinoma; NOR, normal lung sample.

**Table S6.** Annotated biological process of up-regulated DEGs which were overlapped with the PanCancer Panel (n=48)

| Categories <sup>1</sup> | Gene                                                                           | Cluster (%) <sup>2</sup> | Log2 Fold change of AAH / NOR | Log2 Fold change of ADC / NOR |
|-------------------------|--------------------------------------------------------------------------------|--------------------------|-------------------------------|-------------------------------|
| Adhesion                | <i>CEACAM1, CEACAM6, EPCAM, CEACAM8</i>                                        | 3 (75), 7 (25)           | 1.64                          | 2.6                           |
| Antigen Processing      | <i>HLA-DOB</i>                                                                 | 3 (100)                  | 0.54                          | 1.38                          |
| B-Cell Functions        | <i>BLK, CD19, CR2, MS4A1</i>                                                   | 3 (100)                  | 0.98                          | 2.44                          |
| Cell Functions          | <i>CD1A, EPCAM, PMCH, TNFRSF17</i>                                             | 3 (75), 7 (25)           | 1.28                          | 2.38                          |
| Chemokines              | <i>CCL17, CCL22, CXCL13, IL22RA2, TNFSF15, CEACAM8, IL13RA2, CCL28, CXCL14</i> | 3 (56), 4 (22), 7 (22)   | 1.8                           | 3.07                          |
| Complement              | <i>C5, C4BPA, C8A</i>                                                          | 3 (33), 4 (33), 7 (33)   | 1.25                          | 2.17                          |
| Cytokines               | <i>FOXP3, HLA-DOB, LTB, SPPI</i>                                               | 3 (50), 4 (50)           | 0.71                          | 2.25                          |
| Macrophage Functions    | <i>CSF2</i>                                                                    | 3 (100)                  | 0.57                          | 1.21                          |
| Pathogen Defense        | <i>CCL22</i>                                                                   | 3 (100)                  | 1.32                          | 1.91                          |
| Regulation              | <i>CD19, CSF2, DPP4, IL2RA, SPINK5, CDH1, COL3A1</i>                           | 3 (71), 4 (29)           | 0.78                          | 1.89                          |
| T-Cell Functions        | <i>DPP4, F2RL1, FOXP3, IL13RA2</i>                                             | 3 (75), 7 (25)           | 1.45                          | 2.21                          |
| TLR                     | <i>TLR10</i>                                                                   | 7 (100)                  | 1.33                          | 1.8                           |
| TNF Superfamily         | <i>TNFSF15, TNFRSF17, LTB</i>                                                  | 3 (33), 4 (33), 7 (33)   | 1                             | 1.69                          |
| Transporter Functions   | <i>NT5E</i>                                                                    | 3 (100)                  | 1.09                          | 2.48                          |

<sup>1</sup>Categories are from the PanCancer Immune Profiling Panel Gene Ontology information.

<sup>2</sup>Cluster is assigned to cluster name according to the previous DEG analysis and its percentage represents the proportion of the number of genes in each cluster to the number of all genes in each category.

AAH, atypical adenomatous hyperplasia; ADC, adenocarcinoma; NOR, normal lung sample

**Table S7.** Annotated biological process of down-regulated DEGs which were overlapped with the PanCancer Panel (n=91)

| Categories <sup>1</sup> | Gene                                                                                                                                                                                                       | Cluster (%) <sup>2</sup>      | Log2 fold change of AAH / NOR | Log2 fold change of ADC / NOR |
|-------------------------|------------------------------------------------------------------------------------------------------------------------------------------------------------------------------------------------------------|-------------------------------|-------------------------------|-------------------------------|
| Adhesion                | <i>ICAM2, ITGA2B, ITGA5, MCAM</i>                                                                                                                                                                          | 1 (75), 2 (25)                | -0.43                         | -1.54                         |
| Cell Cycle              | <i>CDKN1A</i>                                                                                                                                                                                              | 1 (100)                       | -0.87                         | -1.64                         |
| Cell Functions          | <i>ADORA2A, CSF3, FEZ1, GZMB, GZMH, HSD11B1, IL3RA, KLRF1, MME, NCR1</i>                                                                                                                                   | 1 (50), 2 (40), 5 (10)        | -0.88                         | -2.15                         |
| Chemokines              | <i>CCL2, CCL7, CCL14, CCL16, CCL21, CCL26, CX3CL1, CXCL2, CXCL8, CXCL10, CXCL11, CXCR1, CXCR2, CX3CR1, IL1B, IRF1, XCL2</i>                                                                                | 1 (53), 2 (12), 5 (29), 6 (6) | -1.23                         | -1.81                         |
| Complement              | <i>C9</i>                                                                                                                                                                                                  | 5 (100)                       | -3.01                         | -1.53                         |
| Cytokines               | <i>CCL3L1, CXCL8, CXCL9, CXCL10, IL1A, IL12A, IL1B, IL1R2, IL5RA</i>                                                                                                                                       | 1 (56), 2 (11), 5 (33)        | -1.09                         | -1.87                         |
| Cytotoxicity            | <i>GNLY, GZMB, GZMH, PRF1</i>                                                                                                                                                                              | 2 (100)                       | -0.5                          | -2.04                         |
| Interleukins            | <i>CXCL8, IL6, IL1A, IL12A, IL1B, TNF</i>                                                                                                                                                                  | 1 (50), 5 (50)                | -1.39                         | -2.13                         |
| Leukocyte Functions     | <i>SH2D1B, THBD</i>                                                                                                                                                                                        | 1 (50), 2 (50)                | -0.29                         | -2.58                         |
| Microglial Functions    | <i>CX3CR1</i>                                                                                                                                                                                              | 2 (100)                       | -0.3                          | -1.42                         |
| NK Cell Functions       | <i>IL12A, KIR2DL1, KIR2DL3, KIR3DL1, KIR3DL2, KLRD1, KLRF1, KLRK1, NCR1</i>                                                                                                                                | 1 (33), 2 (67)                | -0.48                         | -2.32                         |
| Pathogen Defense        | <i>CXCL8, CXCL10, IL1B, GNLY, PRF1</i>                                                                                                                                                                     | 1 (20), 2 (40), 5 (40)        | -1.07                         | -1.9                          |
| Regulation              | <i>CCL16, CD34, CDKN1A, CXCR1, CXCR2, IL12A, IL1B, IRF1, KIR3DL2, KLRK1, LILRA1, LILRB2, CCL21, CXCL10, CXCL8, CXCL9, SELE, CD160, CXCL2, KIR2DL1, KIR2DL3, KIR3DL1, ICAM2, KLRD1, NFATC1, TAL1, TBX21</i> | 1 (44), 2 (37), 5 (19)        | -0.8                          | -1.91                         |
| Senescence              | <i>CDKN1A, EGR1, ETS1, IRF1</i>                                                                                                                                                                            | 1 (75), 2 (25)                | -0.75                         | -1.6                          |
| T-Cell Functions        | <i>CX3CL1, CXCL9, CXCL10, CXCL11, EGR1, IL12A, IL18R1, IL18RAP, TBX21</i>                                                                                                                                  | 1 (33), 2 (33), 5 (33)        | -0.97                         | -1.78                         |
| TNF Superfamily         | <i>TNF, TNFAIP3, TNFRSF4</i>                                                                                                                                                                               | 1 (67), 5 (33)                | -1.11                         | -1.64                         |
| Transporter Functions   | <i>CD36, CTSW, PECAMI</i>                                                                                                                                                                                  | 2 (100)                       | -0.35                         | -2.1                          |

<sup>1</sup>Categories are from the PanCancer Immune Profiling Panel Gene Ontology information.

<sup>2</sup>Cluster is assigned to cluster name according to the previous DEG analysis and its percentage represents the proportion of the number of genes in each cluster to the number of all genes in each category.

AAH, atypical adenomatous hyperplasia; ADC, adenocarcinoma; NOR, normal lung sample.
