# Supplementary material for: Gene Expression Profiles of Multiple Synchronous Lesions in Lung Adenocarcinoma
Source: MDPI journal article supplement (doi:10.3390/cells10123484), 2021-12-10
Supplement: s1 [file s1]

Supplementary Figure S1

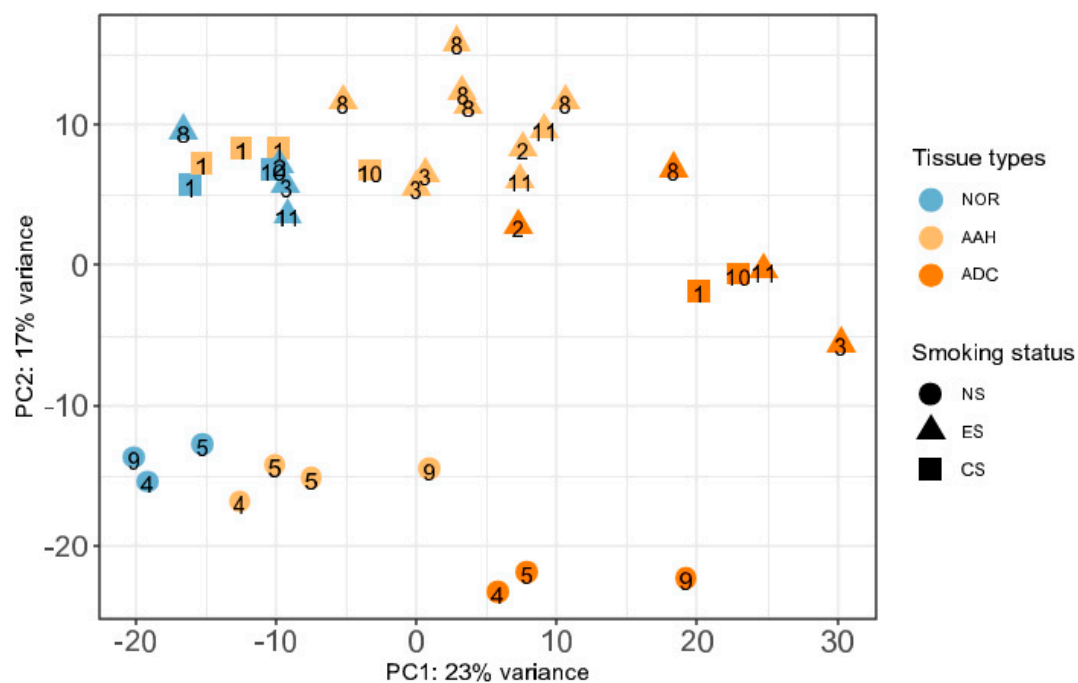

**Figure S1.** Principal component analysis (PCA) plot of RNA-seq samples. AAH, atypical adenomatous hyperplasia; ADC, adenocarcinoma; NOR, normal. CS, current smokers; ES, ex-smokers; NS, non-smokers. Numbers represent sample IDs used in Park *et al.* (2018).

## Supplementary Figure S2

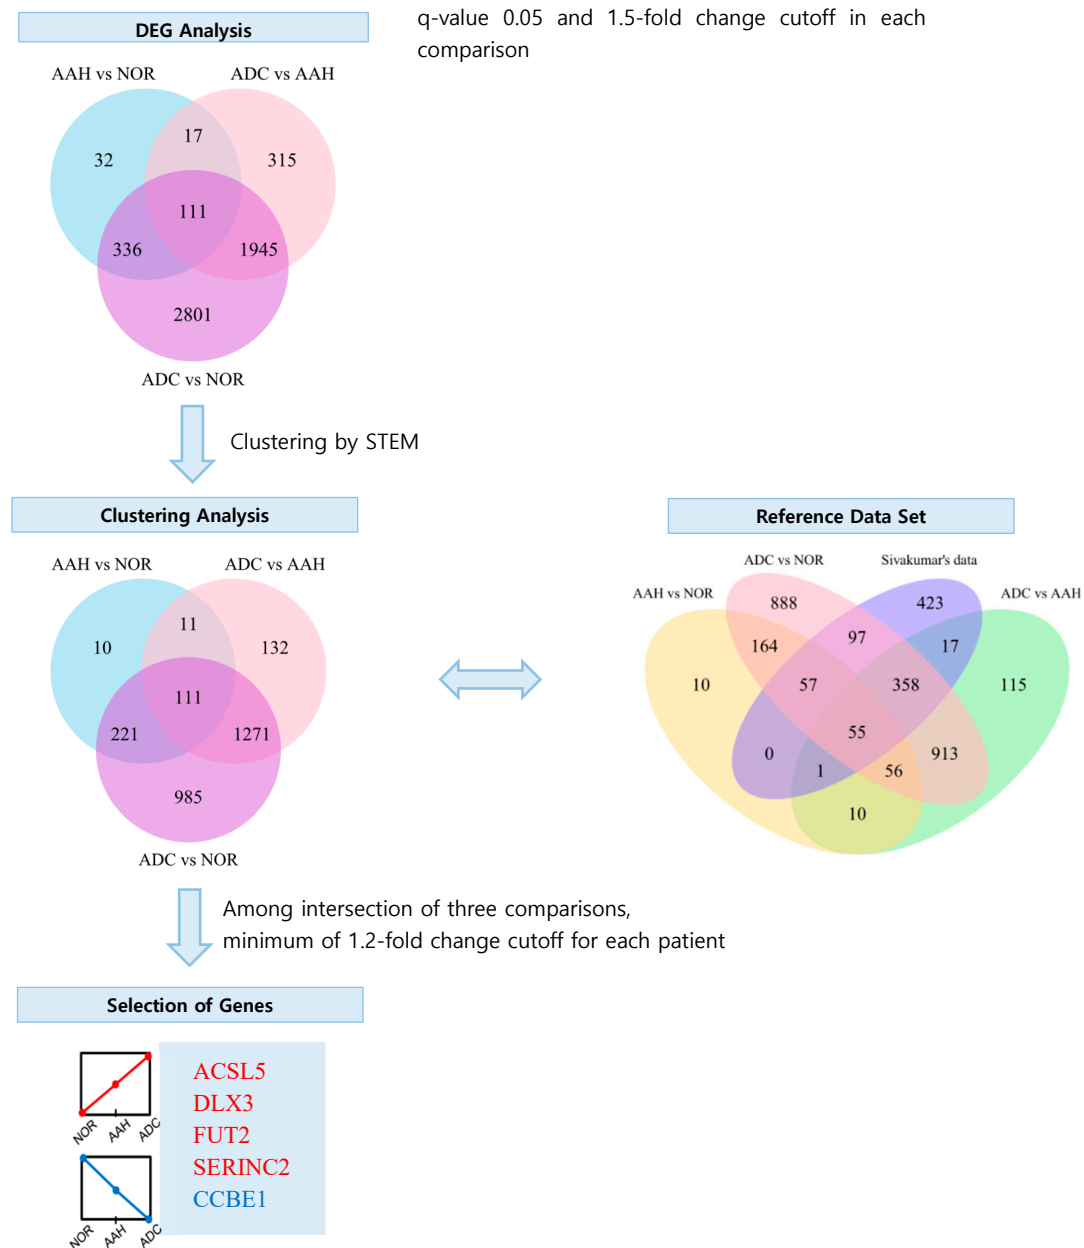

**Figure S2.** Workflow of identification of candidate genes for mRNA expression analysis. Reference data set is collected from DEGs in Sivakumar *et al.*, 2017's data set. AAH, atypical adenomatous hyperplasia; ADC, adenocarcinoma; NOR, normal; FC, fold-change.

# Supplementary Figure S3

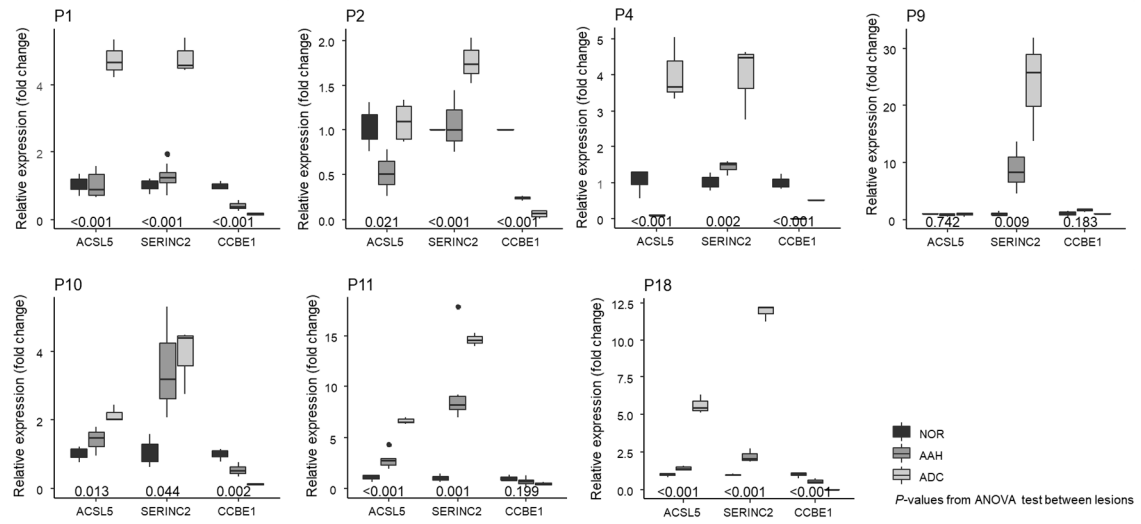

**Figure S3.** Differential gene expression across three tissue types and nine patients. Gene expression profiles were experimentally validated using qPCR. AAH, atypical adenomatous hyperplasia; ADC, adenocarcinoma; NOR, normal.

# Supplementary Figure S4

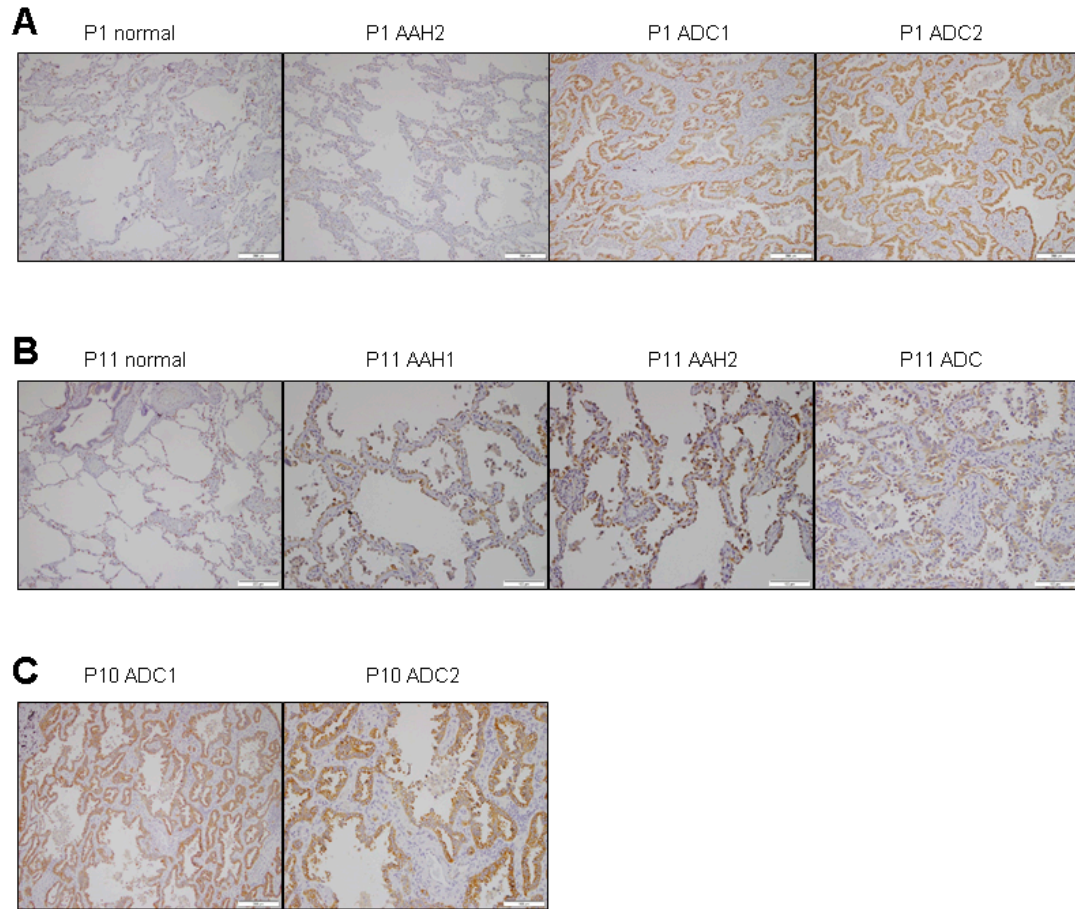

**Figure S4.** ASCL5 protein expression is elevated in AAH and ADC. (A) P1, AAH has partial staining patterns similar to normal tissues. ADC shows strong diffuse patterns (normal [ $\times 100$ ], AAH [ $\times 100$ ], ADC1 [ $\times 100$ ], and ADC2 [ $\times 100$ ]). (B) P11 has an overall increased labeling pattern compared to normal tissue samples and AAH, to ADC. (normal [ $\times 100$ ], AAH1 [ $\times 200$ ], AAH2 [ $\times 200$ ], and ADC [ $\times 200$ ]). (C) P10, ADC shows diffuse staining with a membranous pattern and strong intensity. (ADC1 [ $\times 100$ ], and ADC2 [ $\times 200$ ]). AAH, atypical adenomatous hyperplasia; ADC, adenocarcinoma; NOR, normal.

Supplementary Figure S5

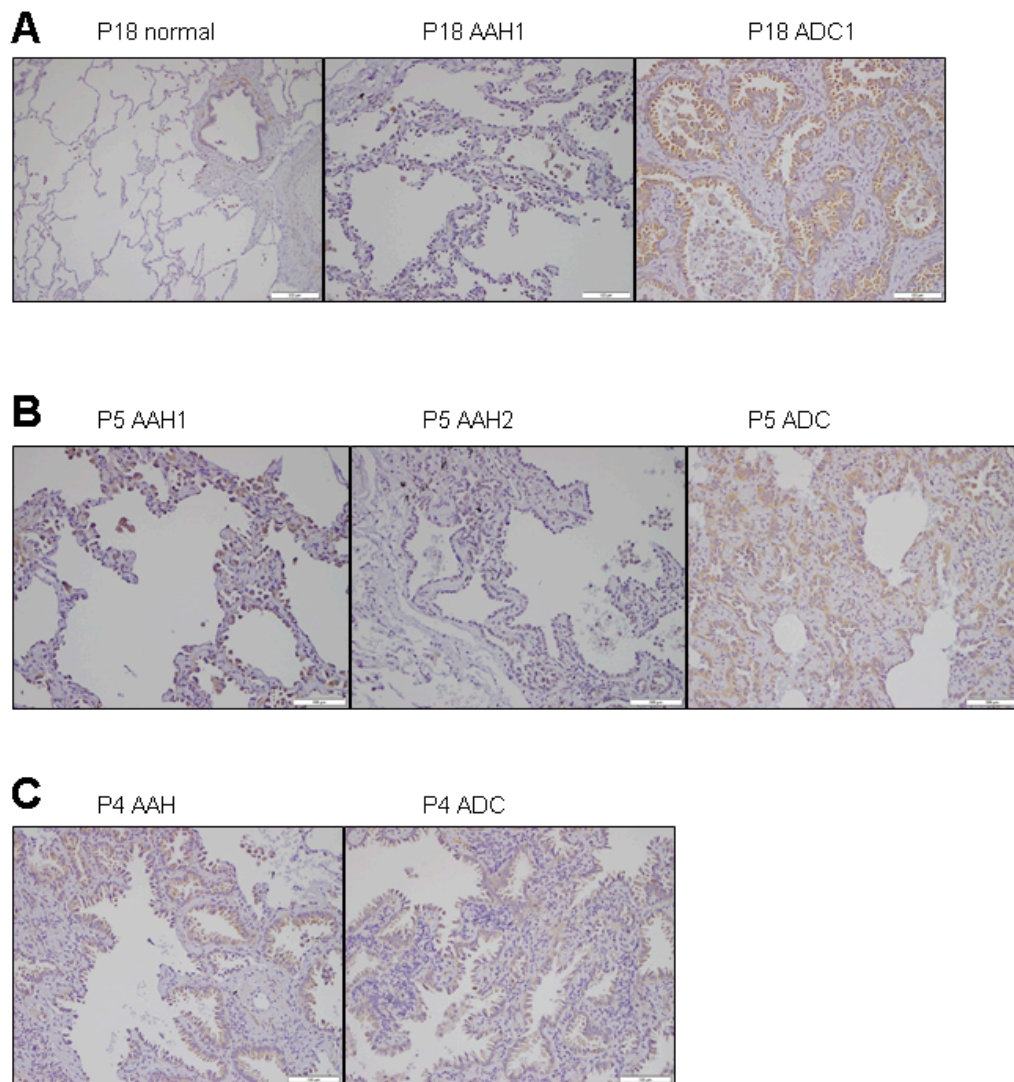

**Figure S5.** FUT2 protein expression in normal, AAH, and ADC tissues. (A) P18: AAH tissue has less FUT2 in pneumocyte cytoplasm, while ADC has consistently higher protein expression (normal [ $\times 100$ ], AAH [ $\times 200$ ], and ADC [ $\times 200$ ]). (B) P5: AAH tissue has less staining in the pneumocyte cytoplasm, while ADC has consistently higher FUT2 expression (AAH1 [ $\times 200$ ], AAH2 [ $\times 200$ ], and ADC [ $\times 200$ ]). (C) P4: AAH and ADC tissues have similar FUT2 protein expression patterns (AAH [ $\times 200$ ], and ADC [ $\times 200$ ]). AAH, atypical adenomatous hyperplasia; ADC, adenocarcinoma; NOR, normal.

Supplementary Figure S6

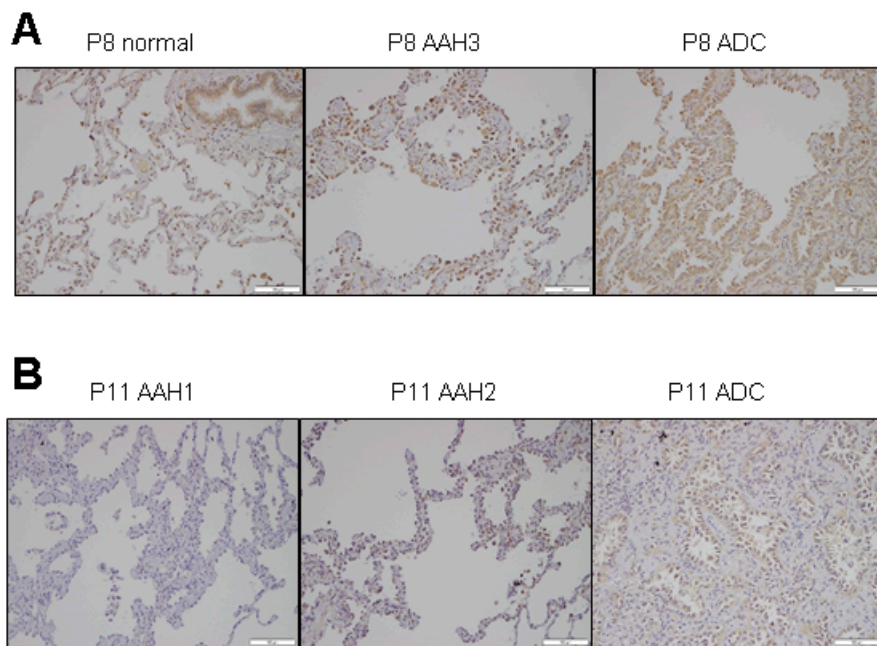

**Figure S6.** SERINC2 protein expression in adjacent non-tumor tissues and the associated AAH and ADC tissues. (A) P8: SERINC2 expression increases in intensity from normal respiratory epithelium, to AAH and ADC (normal [ $\times 200$ ], AAH [ $\times 200$ ], and ADC [ $\times 200$ ]). (B) P11: ADC tissues show a diffuse SERINC2 expression pattern that is stronger than in AAH (AAH1 [ $\times 200$ ], AAH2 [ $\times 200$ ], and ADC [ $\times 200$ ]). AAH, atypical adenomatous hyperplasia; ADC, adenocarcinoma; NOR, normal.

**Supplementary Figure S7**

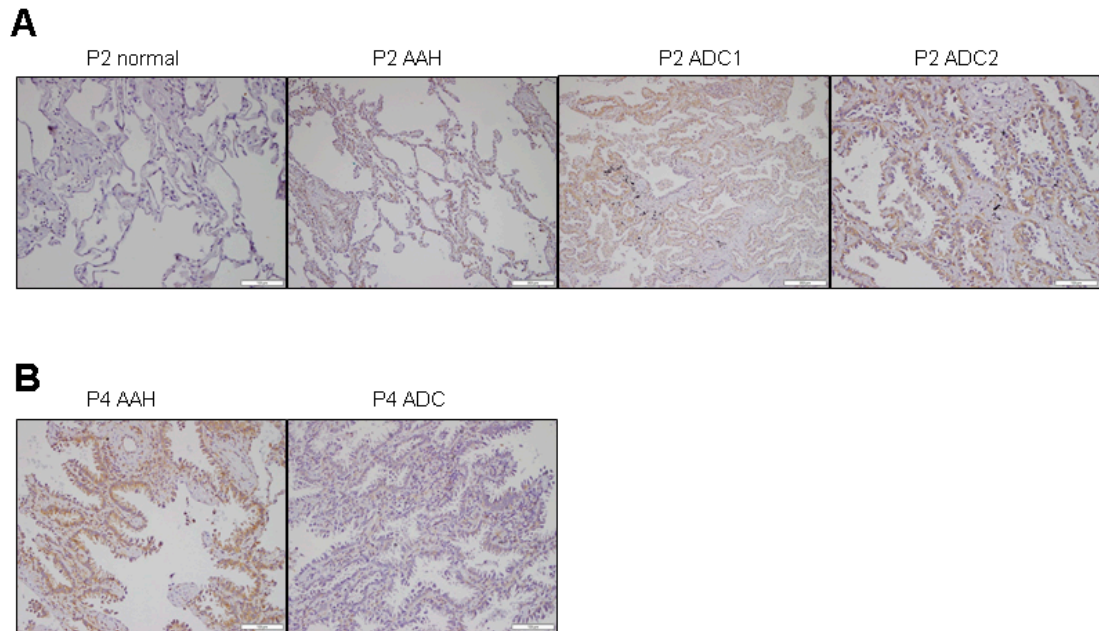

**Figure S7.** DXL3 protein expression visualized with immunohistochemistry. (A) P2: cytoplasmic staining is apparent and is increased in intensity in AAH and ADC samples compared to the control (normal [ $\times 200$ ], AAH [ $\times 100$ ], ADC1 [ $\times 100$ ], and ADC2 [ $\times 200$ ]). (B) P4: cytoplasmic staining is apparent in both tissue samples; however, it is higher in the AAH samples (AAH [ $\times 200$ ], and ADC [ $\times 200$ ]). AAH, atypical adenomatous hyperplasia; ADC, adenocarcinoma; NOR, normal.

**Supplementary Figure S8**

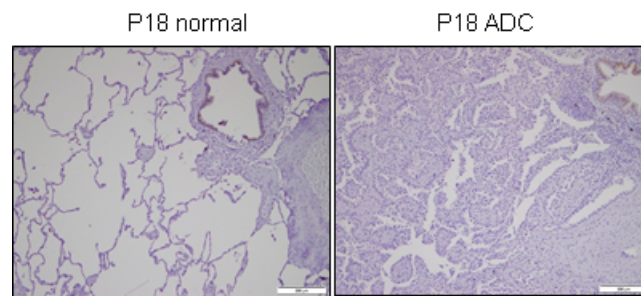

**Figure S8.** CCBE1 protein expression visualized using immunohistochemistry in P18 (normal, and ADC). There was a lack of staining in ADC, and the relative intensity between normal and ADC samples is not confirmed. ADC, adenocarcinoma; NOR, normal.

Supplementary Figure S9

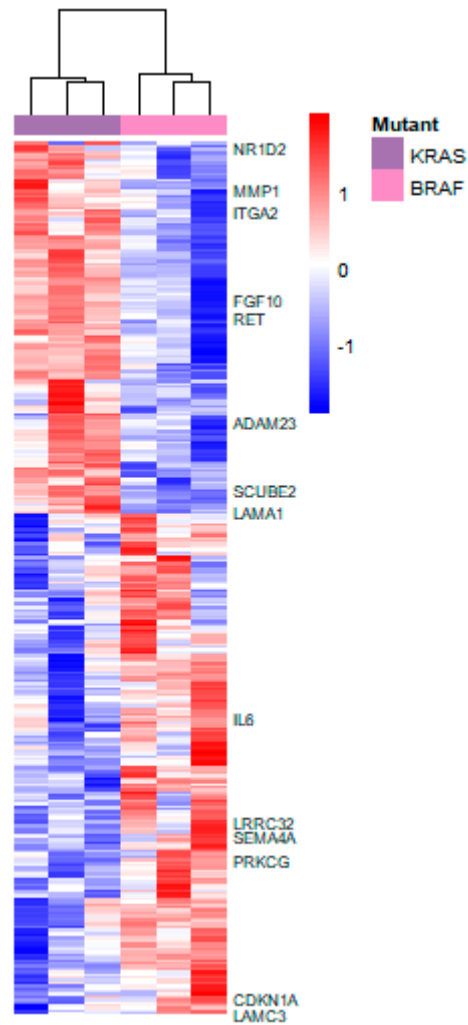

**Figure S9.** Differential gene expression in AAH samples with *BRAF* or *KRAS* mutations. mRNA profiles of *BRAF*- and *KRAS*-mutant AAH samples clustered by complete linkage and correlation similarity. The gene names are obtained from Sivakumar *et al.* (2017) and cancer-related pathway MSigDB cancer gene sets (<http://software.broadinstitute.org/gsea/msigdb/index.jsp>). Samples are presented in columns and mRNA expression in rows. AAH, atypical adenomatous hyperplasia; ADC, adenocarcinoma; NOR, normal.
